# Supplementary material for: Re-Emergence of Circulation of Seasonal Influenza during COVID-19 Pandemic in Russia and Receptor Specificity of New and Dominant Clade 3C.2a1b.2a.2 A(H3N2) Viruses in 2021–2022
Source: MDPI journal article supplement (doi:10.3390/pathogens11111388), 2022-11-21
Supplement: s1 [file s1]

**Table S1. Receptor-binding assay using bio-layer interferometry (error does not exceed 3%).**

| <b>Strain</b>               | <b>K<sub>D</sub>, μM</b> | <b>K<sub>D</sub>, μM + 20 nM oseltamivir</b> |
|-----------------------------|--------------------------|----------------------------------------------|
| A/Cambodia/925256/2020      | 0.002                    | 0.01                                         |
| A/Hong Kong/45/2019         | 0.01                     | 0.01                                         |
| A/Cambodia/e0826360/2020    | 0.04                     | 0.01                                         |
| A/Stockholm/5/2021          | 0.05                     | 0.02                                         |
| A/Yekaterinburg/10-01V/2021 | 0.005                    | 0.02                                         |
| A/YANAO/08-01V/2021         | 0.02                     | 0.03                                         |
| A/Darwin/09/2021            | 0.2                      | 0.7                                          |
