# Supplementary material for: Re-Emergence of Circulation of Seasonal Influenza during COVID-19 Pandemic in Russia and Receptor Specificity of New and Dominant Clade 3C.2a1b.2a.2 A(H3N2) Viruses in 2021–2022
Source: MDPI journal article supplement (doi:10.3390/pathogens11111388), 2022-11-21
Supplement: s1 [file s1]

**Figure S2: Several conformers of the receptor analog from the MD trajectories**

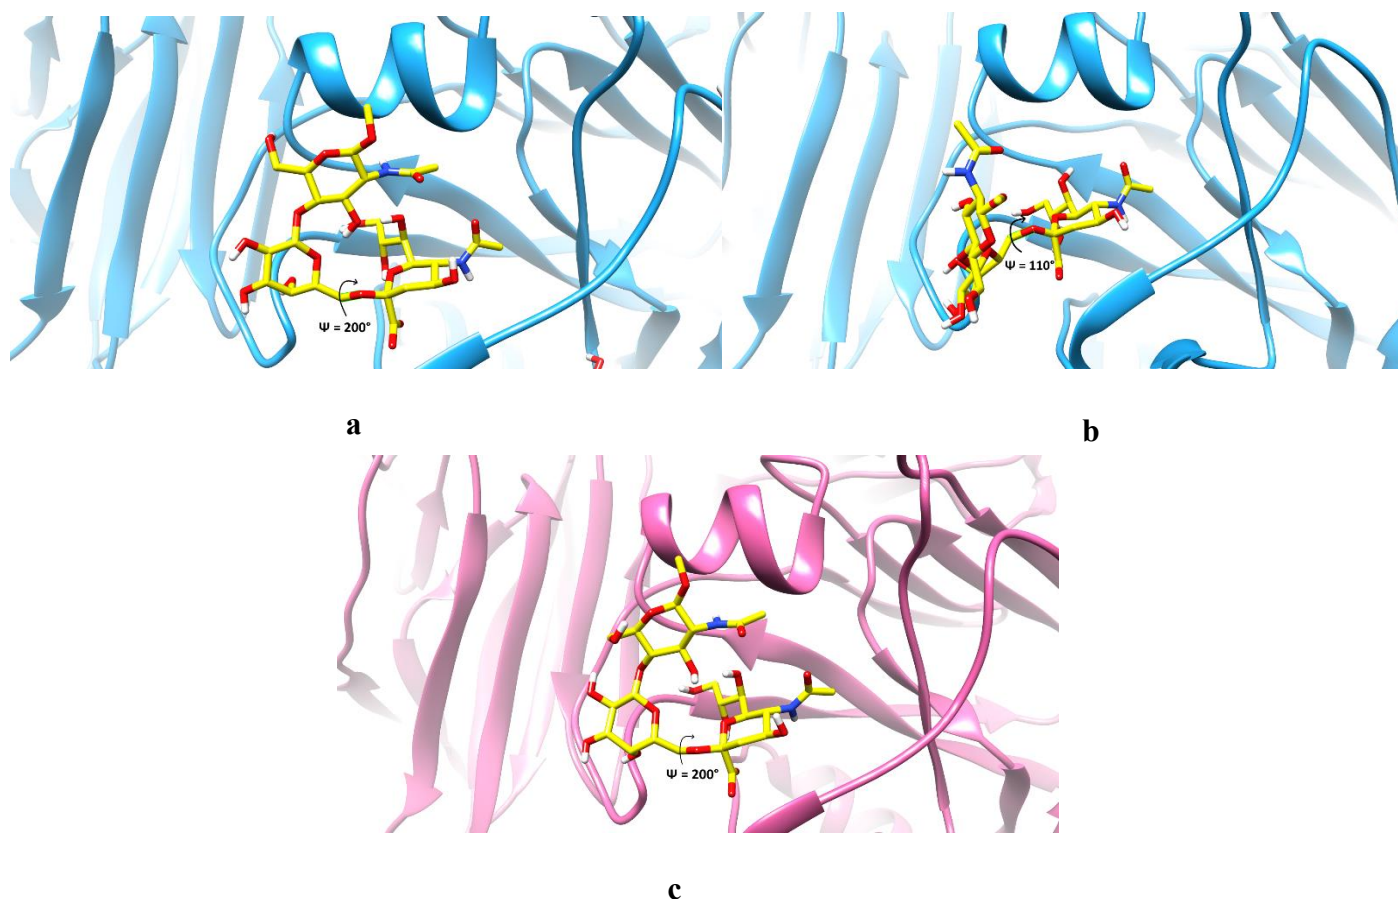

(a) Conformer close to the crystallographic pose (b) conformer associated with the change of the glycosidic torsion angle  $\psi$  by 90 degrees related to the complex with the HA of A/Cambodia/e0826360/2020; (c) conformer related to the complex with the HA of A/YANAO/08-01V/2021.

Receptor analog conformation kept close to the crystallographic pose during the full simulation time after the equilibration (Figure S1) for the complex with HA of A/YANAO/08-01V/2021.
